---

1    **Testing the basic tenet of the molecular clock and neutral theory by using**  
2    **ancient proteomes**

3

4    Tiantian Liu and Shi Huang\*

5

6

7    Center for Medical Genetics and Hunan Key Laboratory of Medical Genetics, School  
8    of Life Sciences, Xiangya Medical School, Central South University, 110 Xiangya  
9    Road, Changsha, Hunan 410078, China

10

11    \*Corresponding author: [huangshi@sklmg.edu.cn](mailto:huangshi@sklmg.edu.cn)

12

13    **Key words:** molecular clock, neutral theory, MGD theory, evolution, ancient proteins

14

## 15 **Abstract**

16 Early research on orthologous protein sequence comparisons by Margoliash in  
 17 1963 discovered the astonishing phenomenon of genetic equidistance, which has  
 18 inspired the *ad hoc* interpretation known as the molecular clock. Kimura then  
 19 developed the neutral theory and claimed the molecular clock as its best evidence.  
 20 However, subsequent studies over the years have largely invalidated the universal  
 21 molecular clock. Yet, a watered down version of the molecular clock and the neutral  
 22 theory still reigns as the default model for phylogenetic inferences. The seemingly  
 23 obvious tenet of the molecular clock on evolutionary time scales remains to be  
 24 established by using ancient sequences: the longer the time of evolutionary  
 25 divergence, the larger the genetic distance. We here analyzed the recently published  
 26 Early Pleistocene enamel proteome from Dmanisi and found that ancient proteins  
 27 were not closer to an outgroup than their orthologs from the extant sister species were.  
 28 Together with a previous study, the combined results showed that most ancient  
 29 proteins were in fact more distant to the outgroup. The results are unexpected from  
 30 the molecular clock but fully predicted by the notion that genetic distances or  
 31 diversities are largely at optimum saturation levels as described by the maximum  
 32 genetic diversity (MGD) theory.

33

## 34 **Introduction:**

35        Since the early 1960s, protein and later DNA sequence comparisons have  
36 become widely used in building evolutionary trees [1-4]. Margoliash in 1963  
37 discovered an astonishing finding, genetic equidistance where sister species are  
38 about equidistant to a simpler outgroup, and made an *ad hoc* interpretation of it by  
39 assuming a molecular clock [2, 5]. The molecular clock hypothesis assumes a  
40 constant and similar evolutionary rate among different species [1, 2, 5]. Thus, gene  
41 non-identity between species is thought to be largely a function of time. The molecular  
42 clock has been widely used in phylogenetic inferences and produced many  
43 controversial conclusions contradictory to phylogenies built by other independent  
44 methods, including the human relationship with the great apes and the origin of  
45 modern humans in Africa rather than Asia.[6-8].

46        The constant and similar mutation rate (i.e., molecular clock) interpretation of the  
47 equidistance result has not been verified by any independent observation and has on  
48 the contrary been contradicted by a large number of facts [9-15]. Nonetheless,  
49 researchers have treated the molecular clock as a genuine reality and have in turn  
50 proposed a number of theories to explain it [16-21]. The 'Neutral Theory' has found  
51 wide acceptance [19-21], even though it is widely acknowledged to be an incomplete  
52 explanation for the clock [13, 22], and an incomplete explanatory theory of nature in  
53 general [23-26]. The observed rate is measured in years but the Neutral theory  
54 predicts a constant rate per generation. Also, the theory predicts that the clock will be

---

55 a Poisson process, with equal mean and variance of mutation rate. Experimental data  
56 have shown that the variance is typically larger than the mean.

57 Ohta's "nearly neutral theory" explained to some extent the generation time issue  
58 by observing that large populations have faster generation times and faster mutation  
59 rates but remains unable to account for the great variance issue [27]. With the neutral  
60 and nearly neutral theory, molecular evolution has been treated as the same as  
61 population genetics or microevolution. However, the field still lacks a complete theory  
62 as Ohta and Gillespie had acknowledged [28]. The field has unfortunately yet to pay  
63 attention to the equidistance result, which has been considered by some as "one of  
64 the most astonishing findings of modern science"[29, 30].

65 While it is widely acknowledged that there is no universal molecular clock (vastly  
66 different species diverged for very long time do not have similar mutation rates), the  
67 seemingly obvious tenet of the molecular clock notion and the neutral theory, i.e., the  
68 longer the evolutionary divergence, the larger the genetic distance or sequence  
69 divergence, remains widely popular in phylogenetic inferences and has yet to be  
70 formally tested or established for species divergence over evolutionary time scales. A  
71 most direct, simple, and strait forward test of the molecular clock would be to use  
72 ancient proteins or DNAs from fossil species. Ancient fossil species are expected to  
73 show less sequence divergence from an outgroup than its extant sister species  
74 (Figure 1). Recent advances in protein sequencing methodology have made such test  
75 feasible. We here analyzed the recently published Early Pleistocene enamel  
76 proteome from Dmanisi [31] and found that ancient proteins are not closer to an

---

77 outgroup than their orthologs from their extant sister species are. The results are  
78 unexpected from the molecular clock but are fully expected from a recently developed  
79 alternative framework.

80

# 81 **Materials and Methods:**

82 Proteome sequences from Dmanisi were from the supplementary materials of the  
83 article by Cappellini [31]. Identification of closest extant proteins and comparisons  
84 with outgroups were performed using BLASTP against the protein database in  
85 Genbank. Extant proteins with the highest identity to the ancient samples were  
86 considered the closest extant proteins. Both the ancient and the extant orthologs were  
87 then aligned with the outgroup protein to determine which was closer to the outgroup.

88

# 89 **Results:**

90 The recently published Early Pleistocene enamel proteome from Dmanisi had a  
91 total of 10 proteins from 6 different fossil samples [31]. The ancient species  
92 represented include one Equidae, one Rhinocerotidae, and four Bovidae. Some  
93 species such as Bovidae were represented by more than one sample and some  
94 proteins were sequenced from more than one sample. However, different peptide  
95 fragments were sequenced from different samples. Thus, each of the total 22 protein  
96 sequences was unique and different from others.

97 Using the ancient sequences, we searched the Genbank to identify the orthologs  
98 from the closest extant sister species. We then compared both the ancient and the

---

99 extant proteins to an outgroup. We first tested human as the outgroup to determine  
100 which shared more identity with human. The peptide fragments of each protein were  
101 each individually examined for identities between the outgroup and the sister species  
102 consisting of the ancient species and its closest extant species. Gaps were not counted  
103 and the same length and region of alignment were maintained for the ancient and its  
104 extant sister species. The results from all peptide fragments of a protein were then  
105 combined to obtain the total number of identical residues and the total alignment  
106 length (Table 1, and Supplementary Table 1). For a total of 22 proteins, five among  
107 them were too short to be informative in terms of revealing any differences between  
108 the two sisters. Of the remaining 17 proteins, fifteen showed lower number of identical  
109 residues between the ancient samples and the outgroup relative to between the  
110 extant proteins and the outgroup while two showed the opposite, indicating that the  
111 ancient proteins were significantly more distant to the outgroup human than the extant  
112 proteins were ( $P < 0.01$ , Chi squared test).

113 To verify the above results, we next tested a different outgroup *Sus scrofa*. Of the  
114 24 proteins, four showed no difference between the sisters and hence were non  
115 informative due to probably the short length covered; 15 showed lower number of  
116 identical residues between the ancient samples and the outgroup relative to between  
117 the extant proteins and the outgroup and 3 showed the opposite (Table 2), indicating  
118 that the ancient proteins were significantly more distant to the outgroup *Sus scrofa*  
119 than the extant proteins were ( $P < 0.01$ , Chi squared test).

---

The ancient sequences analyzed above had all isoleucines converted into leucines, as standard tandem mass spectrometry (MS/MS) cannot differentiate between these two isobaric amino acids. Leucines are about 2 fold more frequent than isoleucines in mammalian proteins. Thus, some leucines in the above analyzed ancient samples may in fact be isoleucines and would cause artificial non-identities with the outgroup. We next focused only on peptides that showed non-identities between the ancient samples and the sister taxon in amino acid positions not involving leucine/isoleucines. Three of five informative proteins showed lower identity between the ancient and the outgroup human relative to that between its extant sister taxon and human while two showed the opposite. With *Sus scrofa* as the outgroup, two of four informative proteins showed lower identity between the ancient and the outgroup relative to that between its extant sister taxon and the outgroup while two showed the opposite (Table 3). As the number of informative proteins were limited, the results were inconclusive with regard to ancient proteins being more distant to the outgroup but did show such a trend. At least, there was no indication that the ancient proteins were closer to the outgroup, as predicted by the molecular clock. Together with a previous study of ours that showed four informative ancient proteins to be all more distant to the outgroup [10], the combined studies showed that 7 or 6 ancient proteins were more distant to the outgroup while 2 were closer. Overall, these results were not expected by the molecular clock hypothesis.

140

## 141 Discussion

---

142 Our results here showed that ancient proteins were not closer to an outgroup  
143 than their orthologs from the closest extant species of the ancient taxon, confirming a  
144 previous study of ours using ancient proteins [10]. These results remained even when  
145 uncertain amino acid positions due to technical limitations such as  
146 leucines/isoleucines were excluded from the analyses. The ancient proteins used  
147 here were from ~2 million years ago and those from the previous study included a  
148 dinosaur protein from 68 million years ago. The timeframe concerned is thus long  
149 enough for ancient proteins to have lower number of substitutions than their orthologs  
150 from their extant sister taxons. And yet 7 or 6 ancient proteins were more distant to  
151 the outgroup while only 2 were closer. The results therefore were unexpected if the  
152 basic tenet of the molecular clock and neutral theory is true that non-identities in  
153 sequences is largely a function of time. That most of the ancient proteins were more  
154 distant to the outgroup was even more unexpected from the molecular clock and  
155 neutral theory. What then may explain the seemingly unexpected observations here?

156 In recent years, a more complete molecular evolutionary theory, the maximum  
157 genetic distance or diversity (MGD) hypothesis, has been making steady progress in  
158 solving both evolutionary and contemporary biomedical problems [6, 8, 25, 32-41].  
159 That reality is largely at maximum genetic diversity or distance no longer changing  
160 with time is *a priori* expected and supported by numerous facts [12, 25, 42, 43].  
161 Genetic distance can increase with time up to a point when maximum saturation is  
162 reached. At such maximum/optimum saturation, genetic distance would no longer be  
163 related to time but are determined by physiological selection and environmental



---

164 selection. The MGD theory has solved the two major puzzles of genetic diversity, the  
165 genetic equidistance phenomenon and the much narrower range of genetic diversity  
166 relative to the large variation in population size [25, 26]. The primary determinant of  
167 genetic diversity (or more precisely MGD) is species physiology with complex  
168 physiology being compatible only with lower levels of random genetic  
169 noises/diversities [25, 44]. The genetic equidistance result of Margoliash in 1963 is in  
170 fact the first and best evidence for maximum distances rather than linear unsaturated  
171 distances as mis-interpreted by the molecular clock and in turn the neutral theory [2, 6,  
172 11, 23, 25, 43]. Two contrasting patterns of the equidistance result have now been  
173 recognized, the maximum and the linear [6, 23]. The neutral theory explains only the  
174 linear pattern, which however represents only a minority of any genome today. The  
175 link between traits/diseases and the amount of SNPs shows an optimum/maximum  
176 (Pareto optimum) genetic diversity level maintained by selection, thereby providing  
177 direct experimental disproof for the neutral assumption for common SNPs [32-38].  
178 More direct functional data invalidating the neutral assumption have also been found  
179 [45].

180       The results here are fully predicted by the MGD theory (Figure 1). If the observed  
181 genetic distance or non-identities of today and of the relatively recent past such as 2  
182 million years ago as in the case of the Dmanisi samples here were at maximum  
183 saturation, it would not be determined by time but by physiology and environmental  
184 adaptations. As the ancient taxon and its closest present day sister species would be  
185 very close in physiology, their genomes would be highly similar if not identical in those

---

186 parts involved in physiology. However, their genomes would be different in the parts  
 187 involved in adaptation to environments since environmental conditions from ~2 million  
 188 years ago are expected to be different from today. As the outgroup species are from  
 189 the present day time, they are expected to share some adaptive variants with all  
 190 present day species as a common adaptive strategy to today's environment. Hence,  
 191 the sister species of the ancient taxon would be expected to be closer to the outgroup  
 192 than the ancient is. The degree of this closeness would be related to the similarities  
 193 between the ancient environments and today's.

194       Using ancient protein or DNA sequences can be very effective in testing  
 195 evolutionary theories. Our results here show that the basic tenet of the molecular  
 196 clock and neutral theory does not hold for evolutionary time scales when maximum  
 197 mutation saturation has been reached. This conclusion is expected to be further  
 198 confirmed when more ancient sequences become available in the future.

199

## 200 **Acknowledgments:**

201 Supported by the National Natural Science Foundation of China grant 81171880 and  
 202 the National Basic Research Program of China grant 2011CB51001.

203

## 204 **References:**

- 205       [1] Zuckerkandl E, Pauling L. Molecular disease, evolution, and genetic  
 206 heterogeneity, Horizons in Biochemistry. New York: Academic Press, 1962.  
 207       [2] Margoliash E. Primary structure and evolution of cytochrome c. Proc. Natl.  
 208 Acad. Sci. 1963;50:672-9.

- 
- 209 [3] Doolittle RF, Blombaeck B. Amino-Acid Sequence Investigations Of  
 210 Fibrinopeptides From Various Mammals: Evolutionary Implications. *Nature*  
 211 1964;202:147-52.
- 212 [4] Fitch WM, Margoliash E. Construction of phylogenetic trees. *Science*  
 213 1967;155:279-84.
- 214 [5] Kumar S. Molecular clocks: four decades of evolution. *Nat Rev Genet*  
 215 2005;6:654-62.
- 216 [6] Huang S. Primate phylogeny: molecular evidence for a pongid clade excluding  
 217 humans and a prosimian clade containing tarsiers. *Sci China Life Sci* 2012;55:709-25.
- 218 [7] Johnson MJ, Wallace DC, Ferris SD, Rattazzi MC, Cavalli-Sforza LL.  
 219 Radiation of human mitochondria DNA types analyzed by restriction endonuclease  
 220 cleavage patterns. *J Mol Evol* 1983;19:255-71.
- 221 [8] Yuan D, Lei X, Gui Y, Zhu Z, Wang D, Yu J, et al. Modern human origins:  
 222 multiregional evolution of autosomes and East Asia origin of Y and mtDNA. *bioRxiv*  
 223 2017;doi: <https://doi.org/10.1101/106864>.
- 224 [9] Huang S. Molecular evidence for the hadrosaur *B. canadensis* as an outgroup  
 225 to a clade containing the dinosaur *T. rex* and birds. *Riv. Biol.* 2009;102:20-2.
- 226 [10] Huang S. Ancient fossil specimens are genetically more distant to an  
 227 outgroup than extant sister species are. *Riv. Biol.* 2008;101:93-108.
- 228 [11] Huang S. The genetic equidistance result of molecular evolution is  
 229 independent of mutation rates. *J. Comp. Sci. Syst. Biol.* 2008;1:092-102.
- 230 [12] Huang S. Inverse relationship between genetic diversity and epigenetic  
 231 complexity. *Nature Precedings* 2008;doi:10.1038/npre.2009.1751.2.
- 232 [13] Pulquerio MJ, Nichols RA. Dates from the molecular clock: how wrong can  
 233 we be? *Trends Ecol Evol* 2007;22:180-4.
- 234 [14] Nei M, Kumar S. *Molecular evolution and phylogenetics*. New York: Oxford  
 235 University Press, 2000.
- 236 [15] Ayala FJ. Molecular clock mirages. *BioEssays* 1999;21:71-5.
- 237 [16] Van Valen L. Molecular evolution as predicted by natural selection. *J. Mol.*  
 238 *Evol.* 1974;3:89-101.
- 239 [17] Clarke B. Darwinian evolution of proteins. *Science* 1970;168:1009-11.
- 240 [18] Richmond RC. Non-Darwinian evolution: a critique. *Nature* 1970;225:1025-8.
- 241 [19] Kimura M. Evolutionary rate at the molecular level. *Nature* 1968;217:624-6.
- 242 [20] Kimura M, Ohta T. On the rate of molecular evolution. *J. Mol. Evol.*  
 243 1971;1:1-17.
- 244 [21] King JL, Jukes TH. Non-Darwinian evolution. *Science* 1969;164:788-98.
- 245 [22] Ayala FJ. Molecular clock mirages. *BioEssays* 1999;21:71-5.
- 246 [23] Hu T, Long M, Yuan D, Zhu Z, Huang Y, Huang S. The genetic equidistance  
 247 result, misreading by the molecular clock and neutral theory and reinterpretation  
 248 nearly half of a century later. *Sci China Life Sci* 2013;56:254-61.
- 249 [24] Kern AD, Hahn MW. The Neutral Theory in Light of Natural Selection. *Mol*  
 250 *Biol Evol* 2018;35:1366-71.
- 251 [25] Huang S. New thoughts on an old riddle: What determines genetic diversity  
 252 within and between species? *Genomics* 2016;108:3-10.

- 253 [26] Leffler EM, Bullaughey K, Matute DR, Meyer WK, Segurel L, Venkat A, et al.  
254 Revisiting an old riddle: what determines genetic diversity levels within species? PLoS  
255 Biol 2012;10:e1001388.
- 256 [27] Ohta T. Slightly deleterious mutant substitutions in evolution. Nature  
257 1973;246:96-8.
- 258 [28] Ohta T, Gillespie JH. Development of Neutral and Nearly Neutral Theories.  
259 Theor Popul Biol 1996;49:128-42.
- 260 [29] Denton M. Evolution: a theory in crisis. Chevy Chase, MD: Adler & Adler,  
261 1986.
- 262 [30] Denton M. Evolution, still a theory in crisis. Seattle, WA: Discovery Institute  
263 Press, 2016.
- 264 [31] Cappellini E, Welker F, Pandolfi L, Ramos-Madrigal J, Samodova D, Ruther  
265 PL, et al. Early Pleistocene enamel proteome from Dmanisi resolves Stephanorhinus  
266 phylogeny. Nature 2019;574:103-7.
- 267 [32] Zhu Z, Lu Q, Wang J, Huang S. Collective effects of common SNPs in  
268 foraging decisions in *Caenorhabditis elegans* and an integrative method of  
269 identification of candidate genes. Sci. Rep. 2015;doi:10.1038/srep16904.
- 270 [33] Zhu Z, Yuan D, Luo D, Lu X, Huang S. Enrichment of Minor Alleles of  
271 Common SNPs and Improved Risk Prediction for Parkinson's Disease. PLoS ONE  
272 2015;10:e0133421.
- 273 [34] Lei X, Yuan J, Zhu Z, Huang S. Collective effects of common SNPs and risk  
274 prediction in lung cancer. Heredity 2018;doi:10.1038/s41437-018-0063-4.
- 275 [35] He P, Lei X, Yuan D, Zhu Z, Huang S. Accumulation of minor alleles and risk  
276 prediction in schizophrenia. Sci Rep 2017;7:11661.
- 277 [36] Lei X, Huang S. Enrichment of minor allele of SNPs and genetic prediction of  
278 type 2 diabetes risk in British population. PLoS ONE 2017;12:e0187644.
- 279 [37] Gui Y, Lei X, Huang S. Collective effects of common SNPs and genetic risk  
280 prediction in type 1 diabetes. Clin Genet 2017;93:1069-74.
- 281 [38] Yuan D, Zhu Z, Tan X, Liang J, Zeng C, Zhang J, et al. Scoring the collective  
282 effects of SNPs: association of minor alleles with complex traits in model organisms.  
283 Sci China Life Sci 2014;57:876-88.
- 284 [39] Yuan D, Huang S. Genetic equidistance at nucleotide level. Genomics  
285 2017;10.1016/j.ygeno.2017.03.002.
- 286 [40] Luo D, Huang S. The genetic equidistance phenomenon at the proteomic  
287 level. Genomics 2016;108:25-30.
- 288 [41] Biswas K, Chakraborty S, Podder S, Ghosh TC. Insights into the dN/dS ratio  
289 heterogeneity between brain specific genes and widely expressed genes in species of  
290 different complexity. Genomics 2016;108:11-7.
- 291 [42] Huang S. Histone methylation and the initiation of cancer, Cancer  
292 Epigenetics. New York: CRC Press, 2008.
- 293 [43] Huang S. The overlap feature of the genetic equidistance result, a  
294 fundamental biological phenomenon overlooked for nearly half of a century. Biological  
295 Theory 2010;5:40-52.

[44] Romiguier J, Gayral P, Ballenghien M, Bernard A, Cahais V, Chenuil A, et al. Comparative population genomics in animals uncovers the determinants of genetic diversity. *Nature* 2014;515:261-3.

[45] Pontis J, Planet E, Offner S, Turelli P, Duc J, Coudray A, et al. Hominoid-Specific Transposable Elements and KZFPs Facilitate Human Embryonic Genome Activation and Control Transcription in Naive Human ESCs. *Cell Stem Cell* 2019;24:724-35 e5.

303

304

305

306

307 **Table 1. Identities between human as the outgroup and the ancient or present**

308 **day species**

| Sample | Protein | Length | Identities to <i>Homo sapiens</i> |         |            |
|--------|---------|--------|-----------------------------------|---------|------------|
|        |         |        | Ancient                           | Present | Difference |
| 16857  | COL1A2  | 613    | 546                               | 554     | -8         |
| 16639  | AMELX   | 89     | 70                                | 77      | -7         |
| 16635  | ENAM    | 249    | 184                               | 189     | -5         |
| 16635  | AMELX   | 173    | 146                               | 150     | -4         |
| 16857  | COL3A1  | 507    | 385                               | 389     | -4         |
| 16632  | AMELX   | 139    | 117                               | 120     | -3         |
| 16632  | MMP20   | 130    | 109                               | 112     | -3         |
| 16635  | AMBN    | 118    | 102                               | 104     | -2         |
| 16635  | AMTN    | 19     | 14                                | 16      | -2         |
| 16638  | AMELX   | 50     | 41                                | 43      | -2         |
| 16635  | MMP20   | 57     | 48                                | 49      | -1         |
| 16638  | AMBN    | 139    | 119                               | 120     | -1         |
| 16639  | AMBN    | 115    | 103                               | 104     | -1         |
| 16641  | AMBN    | 92     | 82                                | 83      | -1         |
| 16641  | AMELX   | 59     | 54                                | 55      | -1         |
| 16632  | ALB     | 27     | 20                                | 20      | 0          |
| 16632  | ENAM    | 182    | 147                               | 147     | 0          |
| 16638  | MMP20   | 44     | 42                                | 42      | 0          |
| 16639  | ENAM    | 123    | 98                                | 98      | 0          |
| 16641  | ENAM    | 67     | 57                                | 57      | 0          |
| 16635  | ALB     | 106    | 77                                | 76      | 1          |
| 16638  | ENAM    | 126    | 106                               | 105     | 1          |

309

310

**Table 2. Identities between *Sus scrofa* as the outgroup and ancient or present**

**day species**

| Sample | Protein | Length | Identities to <i>Sus scrofa</i> |         |            |
|--------|---------|--------|---------------------------------|---------|------------|
|        |         |        | Ancient                         | Present | Difference |
| 16857  | COL1A2  | 621    | 588                             | 596     | -8         |
| 16639  | AMELX   | 87     | 74                              | 79      | -5         |
| 16632  | AMELX   | 136    | 97                              | 101     | -4         |
| 16635  | AMELX   | 172    | 140                             | 144     | -4         |
| 16635  | AMBN    | 121    | 107                             | 109     | -2         |
| 16638  | AMBN    | 139    | 124                             | 126     | -2         |
| 16638  | ENAM    | 127    | 111                             | 113     | -2         |
| 16857  | COL3A1  | 367    | 307                             | 309     | -2         |
| 16632  | MMP20   | 126    | 113                             | 114     | -1         |
| 16635  | AMTN    | 25     | 13                              | 14      | -1         |
| 16639  | AMBN    | 118    | 108                             | 109     | -1         |
| 16639  | ENAM    | 122    | 103                             | 104     | -1         |
| 16641  | ENAM    | 75     | 66                              | 67      | -1         |
| 16641  | AMBN    | 99     | 91                              | 92      | -1         |
| 16641  | AMELX   | 58     | 54                              | 55      | -1         |
| 16632  | ALB     | 26     | 18                              | 18      | 0          |
| 16632  | ENAM    | 183    | 143                             | 143     | 0          |
| 16638  | AMELX   | 49     | 44                              | 44      | 0          |
| 16638  | MMP20   | 44     | 42                              | 42      | 0          |
| 16635  | ALB     | 110    | 78                              | 77      | 1          |
| 16635  | ENAM    | 248    | 196                             | 195     | 1          |
| 16635  | MMP20   | 44     | 37                              | 34      | 3          |

313

**Table 3. Identities between the outgroup and ancient or present day species.**

Amino acids differing between the ancient and its extant sister taxon are in bold.

| Sample | Protein | Peptide                                                                   | Length | Identities to human |         |            | Identities to <i>Sus scrofa</i> |         |            |
|--------|---------|---------------------------------------------------------------------------|--------|---------------------|---------|------------|---------------------------------|---------|------------|
|        |         |                                                                           |        | Ancient             | Present | Difference | Ancient                         | Present | Difference |
| 16635  | ALB     | VFDELKPLVDEPVNLVKEN                                                       | 19     | 13                  | 11      | 2          | 15                              | 13      | 2          |
| 16635  | AMBN    | ANQLNAPGRLGLMSSEEM<br>PGRRGGPMAY                                          | 28     | 23                  | 24      | -1         | 24                              | 25      | -1         |
| 16635  | ENAM    | KQQSKTDPAPETQKPDQP<br>QPEESPPKQHLKQPAATKH<br>EEEEARLPPAFPSFGNGLFP<br>YHQP | 70     | 35                  | 37      | -2         | 41                              | 41      | 0          |
| 16635  | MMP20   | GPRKTFPGKXMPHAPPHN<br>PS                                                  | 21     | 18                  | 19      | -1         | 18                              | 16      | 2          |
| 16638  | ENAM    | FFGYFGYHGFGRRPPYYSE<br>EMFEDFEKPKEE                                       | 31     | 30                  | 29      | 1          | 28                              | 29      | -1         |

316

317

318

# 319 **Figure Legends:**

## 320 **Figure 1. Schemes for testing the molecular clock hypothesis by using ancient**

321 **proteins.** Extant species are represented by numbers 1, 2, and 3. Ancient fossil

322 species is represented by the number 4 with 2 representing the closest extant sister

323 species of 4 and 1 representing the outgroup.

324

325

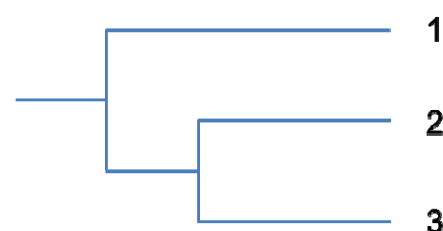

### **Molecular clock prediction:**

1-2 identity = 1-3 identity

1-2 identity < 1-4 identity

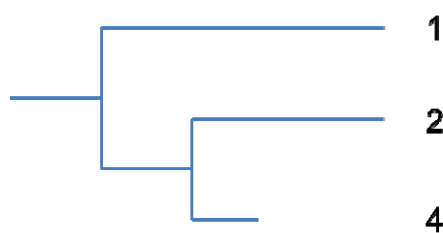

### **MGD theory prediction:**

1-2 identity = 1-3 identity

1-2 identity > 1-4 identity

326

327

328
